# Supplementary material for: Electrochemical and Mechanistic Study of Structure–Activity Relationship of α-, β-, γ-, and δ-Tocopherol on Superoxide Elimination in N,N-Dimethylformamide through Proton-Coupled Electron Transfer
Source: Preprints.org preprint supplement (doi:10.20944/preprints202112.0058.v1), 2021-12-03
Supplement: Supplementary file 1 [file supplementary]

# Electrochemical and Mechanistic Study of Structure–Activity Relationship of $\alpha$ -, $\beta$ -, $\gamma$ -, and $\delta$ -Tocopherol on Superoxide Elimination in *N,N*-Dimethylformamide through Proton-Coupled Electron Transfer

Tatsushi Nakayama <sup>1\*</sup>, Ryo Honda <sup>2</sup>, Kazuo Kuwata <sup>2</sup>, Shigeyuki Usui <sup>1</sup>, and Bunji Uno <sup>3</sup>

<sup>1</sup> Gifu Pharmaceutical University, 1-25-4 Daigaku-nishi, Gifu 501-1196, Japan

<sup>2</sup> United Graduate School of Drug Discovery and Medical Information Sciences, Gifu University, 1-1 Yanagido, Gifu 501-1193, Japan

<sup>3</sup> Faculty of Pharmacy, Gifu University of Medical Science, 4-3-3 Nijigaoka, Kani, Gifu 509-0923, Japan

\* Correspondence: [tnakayama@gifu-pu.ac.jp](mailto:tnakayama@gifu-pu.ac.jp)

## Table of contents

|          |                                                                                            |
|----------|--------------------------------------------------------------------------------------------|
| Pages S2 | Figure S1; scheme of the <i>in-situ</i> electrolytic ESR spectral system                   |
|          | Table S1; comparisons of the $\Delta G^\circ$ s for two mechanisms                         |
| Pages S3 | Figure S2; change in HOMO–LUMO energies                                                    |
| Pages S4 | Figure S3; energy profiles along ET–PT via TS between TOH and HO <sub>2</sub> <sup>•</sup> |
| Pages S5 | Figure S4: Plausible PCET pathways between O <sub>2</sub> <sup>•−</sup> and $\alpha$ -TOH  |

Figure S5: Plausible PCET pathways between  $\text{O}_2^{\bullet-}$  and  $\gamma$ -TOH.

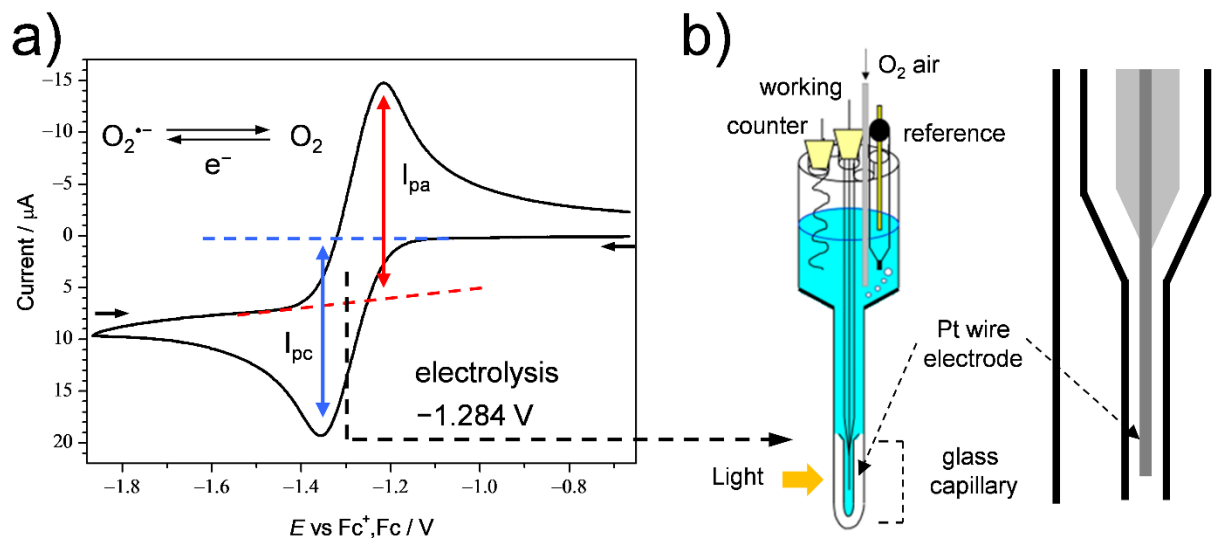

**Figure S1.** *In situ* electrolytic ESR spectral system. (a) Cyclic voltammograms of  $\text{O}_2/\text{O}_2^{\bullet-}$  for potential determination. (b) *In situ* ESR system, composed of an electrochemical ESR cell with a glass small tip, air tube for  $\text{O}_2$  bubbling, and three electrode system using a 0.5-mm-diameter straight Pt wire sealed in a glass capillary as working electrode.

**Table S1.** Free energy changes ( $\Delta G^\circ/\text{kJ mol}^{-1}$ , 298.15 K) of ET between (a)  $\text{TO}^-$  and  $\text{HO}_2^\bullet$  (along intermolecular ET-PT), and between (b)  $\text{TOH}$  and  $\text{HO}_2^\bullet$  (along PCET), in DMF.

|                                         | $\alpha\text{-TO}^-/\alpha\text{-TOH}$ | $\beta\text{-TO}^-/\beta\text{-TOH}$ | $\gamma\text{-TO}^-/\gamma\text{-TOH}$ | $\delta\text{-TO}^-/\delta\text{-TOH}$ |
|-----------------------------------------|----------------------------------------|--------------------------------------|----------------------------------------|----------------------------------------|
| $\text{TO}^-$ and $\text{HO}_2^\bullet$ | -50.3                                  | -40.1                                | -38.6                                  | -28.4                                  |
| $\text{TOH}$ and $\text{HO}_2^\bullet$  | 100.7                                  | 103.3                                | 111.4                                  | 117.1                                  |

<sup>1</sup>  $\Delta G^\circ$ s were calculated using DFT at the (U)B3LYP/PCM/6-311+G(d,p) level. <sup>2</sup> Electron transfer (ET), proton transfer (PT), proton-coupled electron transfer (PCET).

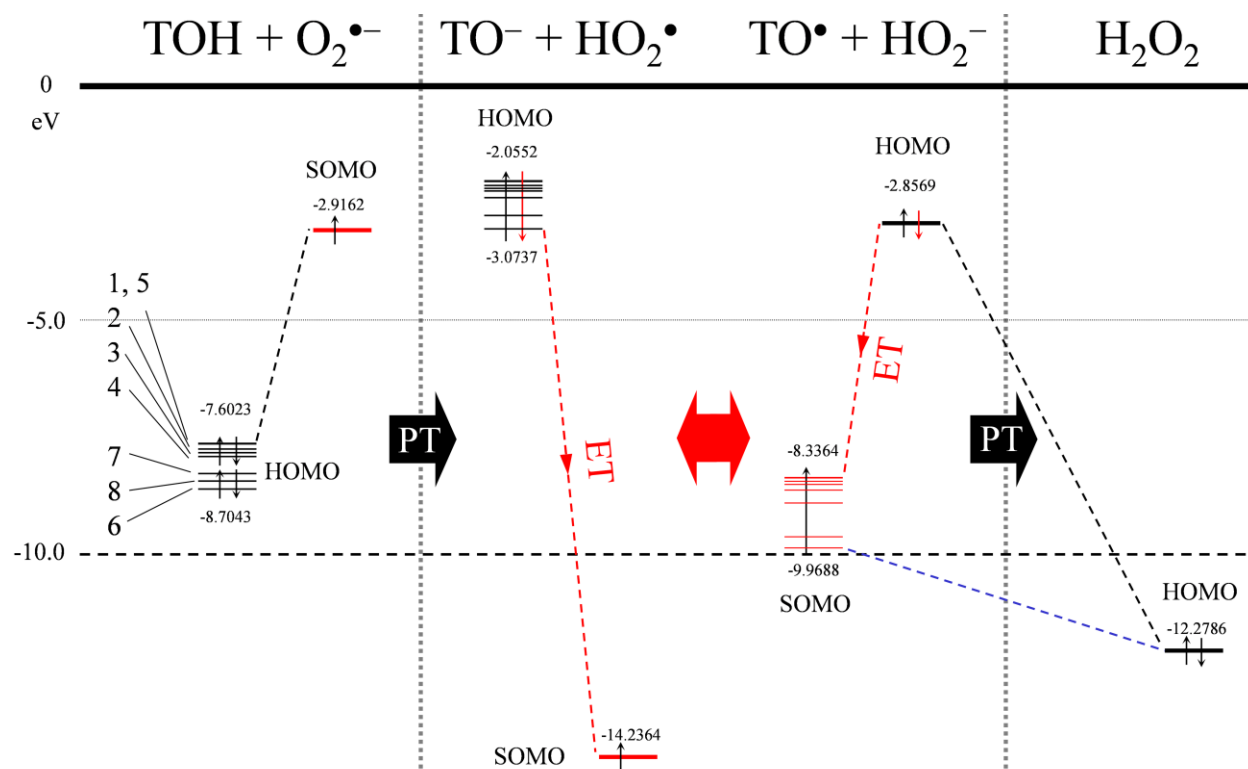

**Figure S2.** Change in highest occupied molecular orbital-lowest unoccupied molecular orbital (HOMO—LUMO) energies ( $E_h/\text{a.u.}$ ) along the  $\text{O}_2^{\bullet-}$  elimination reaction (the first proton transfer (PT), electron transfer (ET), and the second PT) by (a–d)  $\alpha$ -,  $\beta$ -,  $\gamma$ -, and  $\delta$ -TOH, (e) 2,2,5,7,8-pentamethyl-6-chroman-6-ol, (f) homogentisic acid  $\gamma$ -lactone, (g) 2,3-dihydro-2,2-dimethyl-7-hydroxybenzofuran, and (h) trans-*para*-coumaric acid, calculated with the HF/6-311+G(d,p) method.

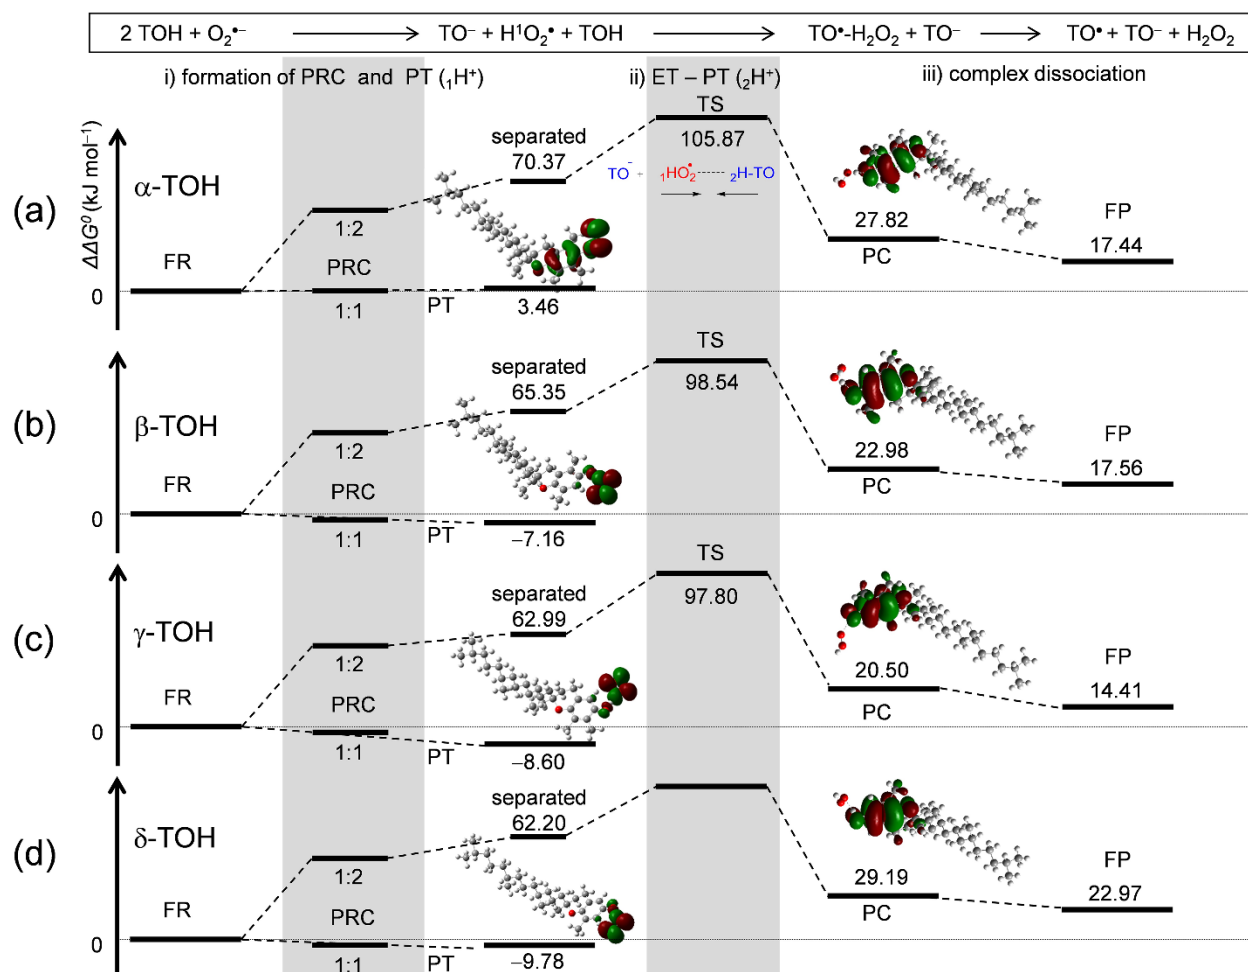

**Figure S3.** Energy profiles along PCET involving two PTs and one ET between two molecule of TOH ( $\alpha$ -,  $\beta$ -,  $\gamma$ -, and  $\delta$ -TOH) and  $\text{O}_2^{\bullet-}$  in DMF, calculated using DFT-(U)B3LYP/PCM/6-311+G(d,p) method. Activation energies ( $\text{kJ mol}^{-1}$ ) of transition states (TS) were obtained for the 1:1 ET-PT pathway between TOH ( $\alpha$ -,  $\beta$ -, and  $\gamma$ -TOH) and  $\text{HO}_2^{\bullet}$ .

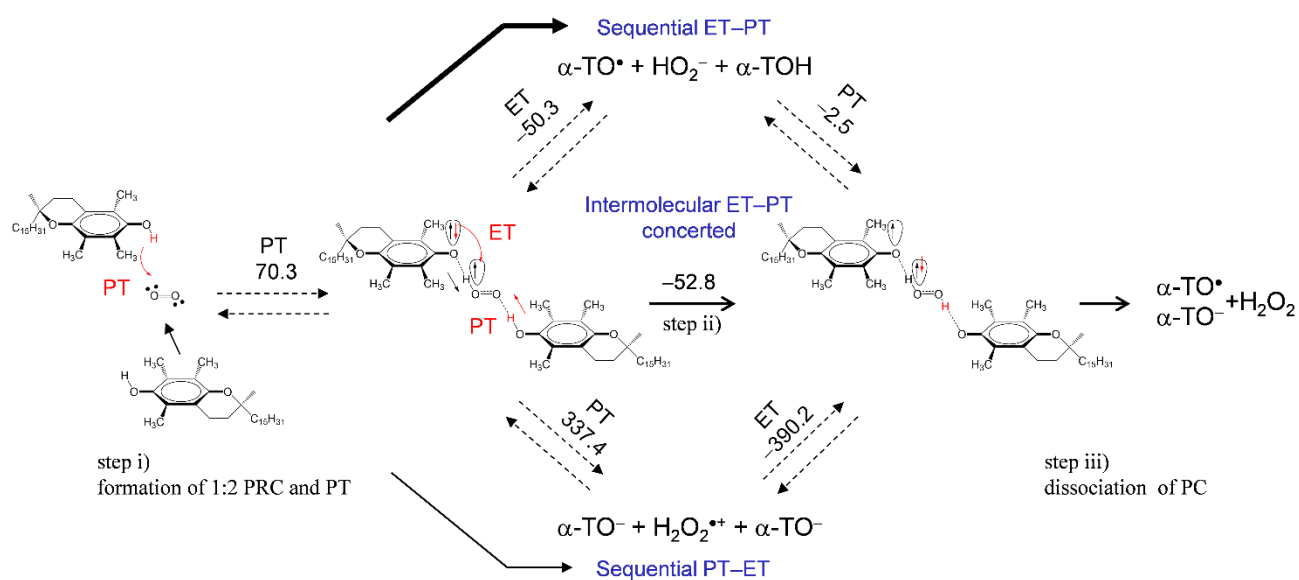

**Figure S4.** Plausible mechanism and the  $\Delta G^\circ$ s ( $\text{kJ mol}^{-1}$ , 298.15 K) for the PCET pathways between  $\text{O}_2^{\bullet-}$  and  $\alpha\text{-TOH}$  involving two PTs and one ET in DMF. The  $\Delta G^\circ$ s were calculated using DFT-(U)B3LYP/PCM/6-311+G(d,p) method.

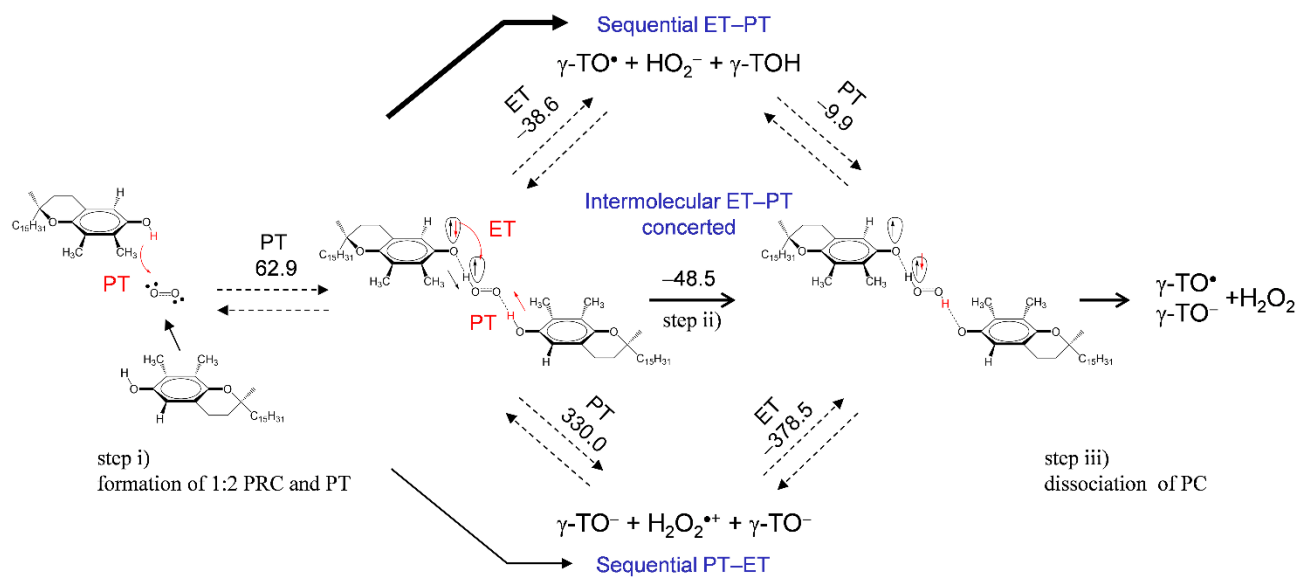

**Figure S5** Plausible mechanism and the  $\Delta G^\circ$ s ( $\text{kJ mol}^{-1}$ , 298.15 K) for the PCET pathways between  $\text{O}_2^{\bullet-}$  and  $\gamma\text{-TOH}$  involving two PTs and one ET in DMF. The  $\Delta G^\circ$ s were calculated using DFT-(U)B3LYP/PCM/6-311+G(d,p) method.
